# Supplementary material
Source: PubMed Central journal article supplement (PMC2720665)
Supplement: 97320630003352S1.pdf [file 97320630003352S1.pdf]

### Supplementary material:

**Formulas S1:** Formulas used to calculate three polymorphic information content values, percentage of heterozygous loci and optimum combination of polymorphic markers, UPIC values.

- Polymorphic information content [5], where  $p_i$  is the frequency of the  $i^{\text{th}}$  allele,  $j$  is the  $j^{\text{th}}$  line (DNA sample or taxonomic unit) and  $n$  is the number of alleles for the marker.

$$PIC=1 - \sum_{i=1}^n p_i^2 - \sum_{i=1}^n \sum_{j=i+1}^n 2p_i p_j^2 \quad \text{Formula 1.1.1}$$

- For the particular case of cross fertilized organisms that have equiprevalent alleles, the formula can be simplified [6]. Same variable notation as in formula 1.1.1.

$$PIC=1 - \sum_{i=1}^n p_i^2 - \sum_{i=1}^n p_i^4 \quad \text{Formula 1.1.2}$$

- In case of self fertilized organisms, or x-chromosome-linked markers in humans, this third term becomes “zero”, and the PIC value is identical to the heterozygosity of the marker [6]. Same variable notation as in formula 1.1.1.

$$PIC=1 - \sum_{i=1}^n p_i^2 \quad \text{Formula 1.1.3}$$

- Percentage of heterozygous loci, where  $H_j$  is the number of heterozygous loci for the  $j^{\text{th}}$  line (DNA sample),  $m$  is the total number of loci or markers, and  $M_j$  is the number of loci for which no alleles were detected (missing data) in the  $j^{\text{th}}$  line.

$$\% \text{ Heterozygous loci} = [H_j / m - M_j] \times 100 \quad \text{Formula 1.2.1}$$

#### UPIC calculation

Allele information of eight polymorphic markers ( $m_1, \dots, m_8$ ) that were run on 12 lines (DNA samples) ( $j_1, \dots, j_{12}$ ) was used in our example to show the mechanics of calculating unique-pattern informative combinations (UPIC). If we assign a letter to each pattern observed for a line (**Table S2b**) and then convert the letters to binary values, where “0” is assigned to an allele pattern present more than once across the lines tested, and “1” is assigned to unique patterns (UP) we obtain **Table S2c**. Let  $UP_{w,j}$  represent the unique pattern indicator for the  $w^{\text{th}}$  marker and the  $j^{\text{th}}$  line shown in **Table S2c**. The number of combinations of markers that can be formed is calculated by the formula below, where  $m$  is the number of polymorphic markers taken in groups of  $k$ , and  $k!$  is  $k$  factorial

$${}^m C_k = \frac{m(m-1)(m-2)\dots \text{to } k \text{ factors}}{k!}$$

Our Perl script that calculate UPIC values only includes possible combinations of  $m$  polymorphic markers taken in groups of  $k$ , for  $k = 2$  to  $k = m/2$ , as  $k = m$  for large values of  $m$  will be computationally intensive.

$${}^m C_k = {}^m C_2 + {}^m C_3 + {}^m C_4 + \dots + {}^m C_{m/2}$$

Let  $N$ =Number of possible combinations as defined above:

$$\text{for } m=8: \\ = {}^8 C_2 + {}^8 C_3 + {}^8 C_4 = \frac{8 \cdot 7}{2!} + \frac{8 \cdot 7 \cdot 6}{3!} + \frac{8 \cdot 7 \cdot 6 \cdot 5}{4!} = 28 + 56 + 70 = 154 \text{ possible combinations } {}^m C_k$$

For each combination of markers, **Table S2d** shows:

- Combined unique patterns ( $CUP_{i,j}$ ) that characterize each line calculated as follows:

$$CUP_{i,j} = \sum_{W^*} C_{w,j}$$

Where  $i = i^{\text{th}}$  set of markers,  $j = j^{\text{th}}$  line,  $W^*$  indicates sum over  $C_{w,j}$  (**Table S2c**) values for all marker in  $i^{\text{th}}$  set of markers.

- Number of Combined Unique Patterns  $NUP_i$

$$NUP_i = \sum_{j=1}^l CUP_{i,j}$$

- Informative combinations ( $IC_i$ ),

$IC_i = \text{True}$  if  $CUP_{i,j} \neq 0$  for all lines( $j$ ), meaning those marker combinations that allow unique identification of each of the lines tested.

Since various IC with different total number of UP can be found, our UPIC script output consists of two columns, one is the total number of UPIC (*i.e.*, 18, **Table S2d**) in the combination, and the other is the marker combination (*i.e.*,  $m_3, m_4, m_8$ ). All UP values of each IC, UPIC plot, for the data in our example are plotted in **Figure 1**.

**Table S1: INPUT FILE for both scripts, UPIC and PIC/Heterozygous loci**

I = Dye/Peak-order; II – Marker; III = Line or DNA sample; IV = amplicon size

| I    | II     | III   | IV  | I    | II     | III   | IV  | I    | II     | III   | IV  |
|------|--------|-------|-----|------|--------|-------|-----|------|--------|-------|-----|
| B,19 | 0094_a | Chn1  | 176 | B,18 | 0015_a | Chn10 | 206 | B,23 | 0284_a | Chn11 | 124 |
| B,8  | 0094_a | Chn10 | 161 | B,30 | 0015_a | Chn11 | 206 | B,26 | 0284_a | Chn11 | 131 |
| B,21 | 0094_a | Chn11 | 161 | B,19 | 0015_a | Chn12 | 206 | B,28 | 0284_a | Chn11 | 135 |
| B,9  | 0094_a | Chn12 | 161 | B,18 | 0015_a | Chn2  | 201 | B,11 | 0284_a | Chn12 | 131 |
| B,9  | 0094_a | Chn2  | 176 | B,19 | 0015_a | Chn2  | 206 | B,12 | 0284_a | Chn12 | 135 |
| B,10 | 0094_a | Chn3  | 176 | B,17 | 0015_a | Chn3  | 201 | B,9  | 0284_a | Chn12 | 123 |
| B,10 | 0094_a | Chn4  | 188 | B,18 | 0015_a | Chn3  | 206 | B,22 | 0284_a | Chn2  | 124 |
| B,15 | 0094_a | Chn5  | 176 | B,15 | 0015_a | Chn4  | 201 | B,24 | 0284_a | Chn2  | 131 |
| B,11 | 0094_a | Chn6  | 183 | B,16 | 0015_a | Chn4  | 207 | B,25 | 0284_a | Chn2  | 136 |
| B,19 | 0094_a | Chn8  | 161 | B,17 | 0015_a | Chn4  | 212 | B,10 | 0284_a | Chn3  | 124 |
| B,10 | 0094_a | Chn9  | 159 | B,25 | 0015_a | Chn5  | 201 | B,12 | 0284_a | Chn3  | 131 |
| B,11 | 0094_a | Chn9  | 161 | B,26 | 0015_a | Chn5  | 206 | B,14 | 0284_a | Chn3  | 136 |
| B,15 | 0094_a | Osn7  | 151 | B,14 | 0015_a | Chn6  | 201 | B,10 | 0284_a | Chn4  | 124 |
| B,17 | 0094_a | Osn7  | 155 | B,15 | 0015_a | Chn6  | 207 | B,12 | 0284_a | Chn4  | 131 |
| B,20 | 0094_a | Osn7  | 163 | B,24 | 0015_a | Chn8  | 123 | B,14 | 0284_a | Chn4  | 135 |
| B,21 | 0094_a | Osn7  | 165 | B,33 | 0015_a | Chn8  | 206 | B,25 | 0284_a | Chn5  | 124 |
| B,23 | 0094_a | Osn7  | 169 | B,17 | 0015_a | Chn9  | 206 | B,27 | 0284_a | Chn5  | 131 |
| B,17 | 0114_a | Chn1  | 160 | B,20 | 0015_a | Osn7  | 114 | B,28 | 0284_a | Chn5  | 136 |
| B,12 | 0114_a | Chn10 | 164 | B,25 | 0015_a | Osn7  | 166 | B,12 | 0284_a | Chn6  | 124 |
| B,17 | 0114_a | Chn11 | 165 | B,32 | 0015_a | Osn7  | 207 | B,14 | 0284_a | Chn6  | 131 |
| B,9  | 0114_a | Chn12 | 165 | B,23 | 0076_a | Chn1  | 118 | B,16 | 0284_a | Chn6  | 135 |
| B,11 | 0114_a | Chn2  | 160 | B,28 | 0076_a | Chn1  | 133 | B,25 | 0284_a | Chn8  | 124 |
| B,9  | 0114_a | Chn3  | 160 | B,14 | 0076_a | Chn10 | 112 | B,27 | 0284_a | Chn8  | 131 |
| B,9  | 0114_a | Chn4  | 160 | B,33 | 0076_a | Chn11 | 112 | B,28 | 0284_a | Chn8  | 134 |
| B,11 | 0114_a | Chn5  | 160 | B,14 | 0076_a | Chn12 | 112 | B,29 | 0284_a | Chn8  | 136 |
| B,9  | 0114_a | Chn6  | 165 | B,13 | 0076_a | Chn2  | 124 | B,10 | 0284_a | Chn9  | 135 |
| B,25 | 0114_a | Chn8  | 164 | B,14 | 0076_a | Chn3  | 127 | B,8  | 0284_a | Chn9  | 124 |
| B,11 | 0114_a | Chn9  | 165 | B,16 | 0076_a | Chn3  | 133 | B,9  | 0284_a | Chn9  | 131 |
| B,23 | 0114_a | Osn7  | 164 | B,16 | 0076_a | Chn4  | 136 | B,33 | 0284_a | Osn7  | 69  |
| B,24 | 0114_a | Osn7  | 166 | B,19 | 0076_a | Chn5  | 124 | B,35 | 0284_a | Osn7  | 225 |
| B,20 | 0124_a | Chn1  | 132 | B,16 | 0076_a | Chn6  | 162 | B,33 | 0350_a | Chn1  | 173 |
| B,10 | 0124_a | Chn10 | 110 | B,17 | 0076_a | Chn6  | 165 | B,17 | 0350_a | Chn10 | 194 |
| B,16 | 0124_a | Chn10 | 125 | B,21 | 0076_a | Chn8  | 112 | B,18 | 0350_a | Chn10 | 196 |
| B,17 | 0124_a | Chn10 | 132 | B,22 | 0076_a | Chn8  | 115 | B,15 | 0350_a | Chn11 | 172 |
| B,17 | 0124_a | Chn11 | 110 | B,14 | 0076_a | Chn9  | 112 | B,16 | 0350_a | Chn11 | 181 |
| B,23 | 0124_a | Chn11 | 125 | B,15 | 0076_a | Chn9  | 115 | B,12 | 0350_a | Chn12 | 172 |
| B,10 | 0124_a | Chn12 | 110 | B,18 | 0076_a | Osn7  | 105 | B,10 | 0350_a | Chn2  | 177 |
| B,15 | 0124_a | Chn12 | 125 | B,34 | 0194_a | Chn1  | 167 | B,12 | 0350_a | Chn3  | 173 |
| B,12 | 0124_a | Chn2  | 111 | B,12 | 0194_a | Chn10 | 158 | B,14 | 0350_a | Chn3  | 177 |
| B,17 | 0124_a | Chn2  | 132 | B,34 | 0194_a | Chn11 | 158 | B,11 | 0350_a | Chn4  | 173 |
| B,10 | 0124_a | Chn3  | 132 | B,16 | 0194_a | Chn12 | 158 | B,14 | 0350_a | Chn4  | 181 |
| B,14 | 0124_a | Chn4  | 132 | B,12 | 0194_a | Chn2  | 167 | B,18 | 0350_a | Chn5  | 171 |
| B,9  | 0124_a | Chn4  | 110 | B,23 | 0194_a | Chn3  | 167 | B,19 | 0350_a | Chn5  | 177 |
| B,15 | 0124_a | Chn5  | 110 | B,15 | 0194_a | Chn4  | 167 | B,13 | 0350_a | Chn6  | 175 |
| B,19 | 0124_a | Chn5  | 132 | B,16 | 0194_a | Chn4  | 172 | B,29 | 0350_a | Chn8  | 196 |
| B,14 | 0124_a | Chn6  | 132 | B,14 | 0194_a | Chn5  | 167 | B,17 | 0350_a | Chn9  | 196 |
| B,9  | 0124_a | Chn6  | 110 | B,35 | 0194_a | Chn6  | 167 | B,13 | 0350_a | Osn7  | 121 |
| B,19 | 0124_a | Chn8  | 110 | B,32 | 0194_a | Chn8  | 158 | B,9  | 0284_a | Chn12 | 123 |
| B,22 | 0124_a | Chn8  | 125 | B,13 | 0194_a | Chn9  | 158 | B,22 | 0284_a | Chn2  | 124 |
| B,10 | 0124_a | Chn9  | 110 | B,21 | 0194_a | Osn7  | 168 | B,24 | 0284_a | Chn2  | 131 |
| B,15 | 0124_a | Chn9  | 125 | B,22 | 0194_a | Osn7  | 175 | B,25 | 0284_a | Chn2  | 136 |
| B,17 | 0124_a | Chn9  | 134 | B,23 | 0284_a | Chn1  | 124 | B,10 | 0284_a | Chn3  | 124 |
| B,24 | 0124_a | Osn7  | 110 | B,25 | 0284_a | Chn1  | 131 | B,12 | 0284_a | Chn3  | 131 |
| B,25 | 0124_a | Osn7  | 119 | B,26 | 0284_a | Chn1  | 136 | B,14 | 0284_a | Chn3  | 136 |
| B,30 | 0124_a | Osn7  | 132 | B,10 | 0284_a | Chn10 | 131 | B,10 | 0284_a | Chn4  | 124 |
| B,27 | 0015_a | Chn1  | 206 | B,11 | 0284_a | Chn10 | 135 | B,12 | 0284_a | Chn4  | 131 |

**Table S2: UPIC: Calculation of Unique Pattern Informative Combination of polymorphic markers.**

|   | Amplicon  | Line 1 | Line 2 | Line 3 | Line 4 | Line 5 | Line 6 | Line 7 | Line 8 | Line 9 | Line 10 | Line 11 | Line 12 |       |
|---|-----------|--------|--------|--------|--------|--------|--------|--------|--------|--------|---------|---------|---------|-------|
| a | Marker 15 | 114    |        |        |        |        |        |        |        |        |         |         | 0.333   |       |
|   |           | 123    |        |        |        |        |        | 0.5    |        |        |         |         |         |       |
|   |           | 166    |        |        |        |        |        |        |        |        |         |         | 0.333   |       |
|   |           | 201    |        | 0.5    | 0.5    | 0.333  | 0.5    | 0.5    |        |        |         |         |         |       |
|   |           | 206    | 1      | 0.5    | 0.5    |        | 0.5    |        | 0.5    | 1      | 1       | 1       | 1       |       |
|   |           | 207    |        |        |        | 0.333  |        | 0.5    |        |        |         |         |         | 0.333 |
|   |           | 212    |        |        |        | 0.333  |        |        |        |        |         |         |         |       |

| MARKERS | Marker order | PATTERNS: identical patterns within each marker are identified by the same letter. |   |   |   |   |   |   |   |   |   |   |   |   |
|---------|--------------|------------------------------------------------------------------------------------|---|---|---|---|---|---|---|---|---|---|---|---|
| b       | 94           | 1                                                                                  | A | A | A | B | A | C | D | E | D | D | D | F |
|         | 114          | 2                                                                                  | A | A | A | A | A | B | C | B | C | B | B | D |
|         | 124          | 3                                                                                  | A | B | A | C | C | C | D | E | F | D | D | G |
|         | 15           | 4                                                                                  | A | B | B | C | B | D | E | A | A | A | A | F |
|         | 76           | 5                                                                                  | A | B | C | D | B | E | F | F | G | G | G | H |
|         | 194          | 6                                                                                  | A | A | A | B | C | C | D | D | D | D | D | E |
|         | 284          | 7                                                                                  | A | A | A | B | A | B | C | B | D | B | E | F |
|         | 350          | 8                                                                                  | A | B | C | D | E | F | G | G | H | I | J | K |

| MARKERS | Marker order | Only unique patterns are replaced by # "1", others by "zero" |   |   |   |   |   |   |   |   |   |   |   |   |
|---------|--------------|--------------------------------------------------------------|---|---|---|---|---|---|---|---|---|---|---|---|
| c       | 94           | 1                                                            | 0 | 0 | 0 | 1 | 0 | 1 | 0 | 1 | 0 | 0 | 0 | 1 |
|         | 114          | 2                                                            | 0 | 0 | 0 | 0 | 0 | 0 | 0 | 0 | 0 | 0 | 0 | 1 |
|         | 124          | 3                                                            | 0 | 1 | 0 | 0 | 0 | 0 | 0 | 1 | 1 | 0 | 0 | 1 |
|         | 15           | 4                                                            | 0 | 0 | 0 | 1 | 0 | 1 | 1 | 0 | 0 | 0 | 0 | 1 |
|         | 76           | 5                                                            | 1 | 0 | 1 | 1 | 0 | 1 | 0 | 0 | 0 | 0 | 0 | 1 |
|         | 194          | 6                                                            | 0 | 0 | 0 | 1 | 0 | 0 | 0 | 0 | 0 | 0 | 0 | 1 |
|         | 284          | 7                                                            | 0 | 0 | 0 | 0 | 0 | 0 | 1 | 0 | 1 | 0 | 1 | 1 |
|         | 350          | 8                                                            | 1 | 1 | 1 | 1 | 1 | 1 | 0 | 0 | 1 | 1 | 1 | 1 |

| Number of | UPIC | Marker combination | Examples of combinatorial addition of patterns. Non-zero additions are IC |   |   |   |   |   |   |   |   |   |   |   |
|-----------|------|--------------------|---------------------------------------------------------------------------|---|---|---|---|---|---|---|---|---|---|---|
| d         | -    | 1+2                | 0                                                                         | 0 | 0 | 1 | 0 | 1 | 0 | 1 | 0 | 0 | 0 | 2 |
|           | -    | 1+7                | 0                                                                         | 0 | 0 | 1 | 0 | 1 | 1 | 1 | 1 | 0 | 1 | 2 |
|           | -    | 2+3                | 0                                                                         | 1 | 0 | 0 | 0 | 0 | 0 | 1 | 1 | 0 | 0 | 2 |
|           | -    | 2+6                | 0                                                                         | 0 | 0 | 1 | 0 | 0 | 0 | 0 | 0 | 0 | 0 | 2 |
|           | 18   | 3+4+8              | 1                                                                         | 2 | 1 | 2 | 1 | 2 | 1 | 1 | 2 | 1 | 1 | 3 |
|           | 23   | 3+4+5+8            | 2                                                                         | 2 | 2 | 3 | 1 | 3 | 1 | 1 | 2 | 1 | 1 | 4 |
|           | 27   | 1+3+4+5+8          | 2                                                                         | 2 | 2 | 4 | 1 | 4 | 1 | 2 | 2 | 1 | 1 | 5 |

**Table S3: UPIC values, output of UPIC version 1.0.** The first column corresponds to Unique Patterns (UP) or alleles detected by the marker combination. Combinations of Markers are listed ONLY if they can discriminate ALL DNA samples, we define these combinations as "Informative Combinations" (IC), and their corresponding value UP is the number of patterns or alleles that the combination detects. The user can choose HOW MANY markers to run according to his/her budget, and then finds the combination with the highest UP value. Example of 8 polymorphic markers runs for 12 DNA samples. Note: the combination of markers 350, 15, 76 and 124 can discriminate the 12 DNAs showing 23 different alleles or patterns.

| UPIC                  |                       | M1     | M2     | M3     | M4     | M5     | M6     | M7     | M8     |  |
|-----------------------|-----------------------|--------|--------|--------|--------|--------|--------|--------|--------|--|
| 2_Marker_Combinations | 18                    | 0015_a | 0124_a | 0350_a |        |        |        |        |        |  |
|                       | 18                    | 0094_a | 0015_a | 0350_a |        |        |        |        |        |  |
|                       | 18                    | 0284_a | 0124_a | 0350_a |        |        |        |        |        |  |
|                       | 18                    | 0284_a | 0094_a | 0350_a |        |        |        |        |        |  |
| 3_Marker_Combinations | 23                    | 0350_a | 0015_a | 0076_a | 0124_a |        |        |        |        |  |
|                       | 23                    | 0094_a | 0350_a | 0284_a | 0076_a |        |        |        |        |  |
|                       | 23                    | 0350_a | 0284_a | 0076_a | 0124_a |        |        |        |        |  |
|                       | 23                    | 0094_a | 0350_a | 0015_a | 0076_a |        |        |        |        |  |
|                       | 22                    | 0094_a | 0350_a | 0015_a | 0124_a |        |        |        |        |  |
|                       | 22                    | 0350_a | 0284_a | 0015_a | 0124_a |        |        |        |        |  |
|                       | 22                    | 0094_a | 0350_a | 0284_a | 0124_a |        |        |        |        |  |
|                       | 22                    | 0094_a | 0350_a | 0284_a | 0015_a |        |        |        |        |  |
|                       | 20                    | 0194_a | 0094_a | 0350_a | 0015_a |        |        |        |        |  |
|                       | 20                    | 0194_a | 0094_a | 0350_a | 0284_a |        |        |        |        |  |
|                       | 20                    | 0194_a | 0350_a | 0015_a | 0124_a |        |        |        |        |  |
|                       | 20                    | 0194_a | 0350_a | 0284_a | 0124_a |        |        |        |        |  |
|                       | 19                    | 0350_a | 0114_a | 0015_a | 0124_a |        |        |        |        |  |
|                       | 19                    | 0094_a | 0350_a | 0114_a | 0015_a |        |        |        |        |  |
|                       | 19                    | 0350_a | 0114_a | 0284_a | 0124_a |        |        |        |        |  |
|                       | 19                    | 0094_a | 0350_a | 0114_a | 0284_a |        |        |        |        |  |
| 4_Marker_Combinations |                       |        |        |        |        |        |        |        |        |  |
| 5_Marker_Combinations | 27                    | 0094_a | 0015_a | 0350_a | 0076_a | 0124_a |        |        |        |  |
|                       | 27                    | 0094_a | 0284_a | 0350_a | 0076_a | 0124_a |        |        |        |  |
|                       | 27                    | 0094_a | 0284_a | 0015_a | 0350_a | 0076_a |        |        |        |  |
|                       | 27                    | 0284_a | 0015_a | 0350_a | 0076_a | 0124_a |        |        |        |  |
|                       | 26                    | 0094_a | 0284_a | 0015_a | 0350_a | 0124_a |        |        |        |  |
|                       | 25                    | 0194_a | 0015_a | 0350_a | 0076_a | 0124_a |        |        |        |  |
|                       | 25                    | 0194_a | 0284_a | 0350_a | 0076_a | 0124_a |        |        |        |  |
|                       | 25                    | 0194_a | 0094_a | 0284_a | 0350_a | 0076_a |        |        |        |  |
|                       | 25                    | 0194_a | 0094_a | 0015_a | 0350_a | 0076_a |        |        |        |  |
|                       | 24                    | 0015_a | 0350_a | 0114_a | 0076_a | 0124_a |        |        |        |  |
|                       | 24                    | 0094_a | 0284_a | 0350_a | 0114_a | 0076_a |        |        |        |  |
|                       | 24                    | 0194_a | 0094_a | 0284_a | 0015_a | 0350_a |        |        |        |  |
|                       | 24                    | 0284_a | 0350_a | 0114_a | 0076_a | 0124_a |        |        |        |  |
|                       | 24                    | 0194_a | 0094_a | 0284_a | 0350_a | 0124_a |        |        |        |  |
|                       | 24                    | 0194_a | 0284_a | 0015_a | 0350_a | 0124_a |        |        |        |  |
|                       | 24                    | 0194_a | 0094_a | 0015_a | 0350_a | 0124_a |        |        |        |  |
|                       | 24                    | 0094_a | 0015_a | 0350_a | 0114_a | 0076_a |        |        |        |  |
|                       | 23                    | 0094_a | 0284_a | 0350_a | 0114_a | 0124_a |        |        |        |  |
|                       | 23                    | 0094_a | 0015_a | 0350_a | 0114_a | 0124_a |        |        |        |  |
|                       | 23                    | 0284_a | 0015_a | 0350_a | 0114_a | 0124_a |        |        |        |  |
|                       | 23                    | 0094_a | 0284_a | 0015_a | 0350_a | 0114_a |        |        |        |  |
|                       | 21                    | 0194_a | 0284_a | 0350_a | 0114_a | 0124_a |        |        |        |  |
|                       | 21                    | 0194_a | 0094_a | 0284_a | 0350_a | 0114_a |        |        |        |  |
|                       | 21                    | 0194_a | 0094_a | 0015_a | 0350_a | 0114_a |        |        |        |  |
|                       | 21                    | 0194_a | 0015_a | 0350_a | 0114_a | 0124_a |        |        |        |  |
|                       | 6_Marker_Combinations | 31     | 0350_a | 0284_a | 0015_a | 0094_a | 0076_a | 0124_a |        |  |
|                       |                       | 29     | 0350_a | 0284_a | 0015_a | 0194_a | 0076_a | 0124_a |        |  |
| 29                    |                       | 0350_a | 0015_a | 0194_a | 0094_a | 0076_a | 0124_a |        |        |  |
| 29                    |                       | 0350_a | 0284_a | 0194_a | 0094_a | 0076_a | 0124_a |        |        |  |
| 29                    |                       | 0350_a | 0284_a | 0015_a | 0194_a | 0094_a | 0076_a |        |        |  |
| 28                    |                       | 0350_a | 0015_a | 0094_a | 0114_a | 0076_a | 0124_a |        |        |  |
| 28                    |                       | 0350_a | 0284_a | 0015_a | 0114_a | 0076_a | 0124_a |        |        |  |
| 28                    |                       | 0350_a | 0284_a | 0015_a | 0194_a | 0094_a | 0124_a |        |        |  |
| 28                    |                       | 0350_a | 0284_a | 0015_a | 0094_a | 0114_a | 0076_a |        |        |  |
| 28                    |                       | 0350_a | 0284_a | 0094_a | 0114_a | 0076_a | 0124_a |        |        |  |
| 27                    |                       | 0350_a | 0284_a | 0015_a | 0094_a | 0114_a | 0124_a |        |        |  |
| 26                    |                       | 0350_a | 0284_a | 0194_a | 0114_a | 0076_a | 0124_a |        |        |  |
| 26                    |                       | 0350_a | 0015_a | 0194_a | 0114_a | 0076_a | 0124_a |        |        |  |
| 26                    |                       | 0350_a | 0015_a | 0194_a | 0094_a | 0114_a | 0076_a |        |        |  |
| 26                    |                       | 0350_a | 0284_a | 0194_a | 0094_a | 0114_a | 0076_a |        |        |  |
| 25                    |                       | 0350_a | 0015_a | 0194_a | 0094_a | 0114_a | 0124_a |        |        |  |
| 25                    |                       | 0350_a | 0284_a | 0015_a | 0194_a | 0114_a | 0124_a |        |        |  |
| 25                    | 0350_a                | 0284_a | 0194_a | 0094_a | 0114_a | 0124_a |        |        |        |  |
| 7_Marker_Combinations | 33                    | 0094_a | 0350_a | 0015_a | 0194_a | 0076_a | 0124_a | 0284_a |        |  |
|                       | 32                    | 0094_a | 0350_a | 0015_a | 0114_a | 0076_a | 0124_a | 0284_a |        |  |
|                       | 30                    | 0350_a | 0015_a | 0194_a | 0114_a | 0076_a | 0124_a | 0284_a |        |  |
|                       | 30                    | 0094_a | 0350_a | 0015_a | 0194_a | 0114_a | 0076_a | 0284_a |        |  |
|                       | 30                    | 0094_a | 0350_a | 0015_a | 0194_a | 0114_a | 0076_a | 0124_a |        |  |
|                       | 30                    | 0094_a | 0350_a | 0194_a | 0114_a | 0076_a | 0124_a | 0284_a |        |  |
|                       | 29                    | 0094_a | 0350_a | 0015_a | 0194_a | 0114_a | 0124_a | 0284_a |        |  |
| 8_Marker_Combinations | 34                    | 0015_a | 0194_a | 0114_a | 0284_a | 0350_a | 0094_a | 0076_a | 0124_a |  |

**Table S4: Output for PIC values and Percentage of Heterozygous Loci.** The five columns on the bottom correspond to: marker, square of the allele frequency, PIC value for self fertilized organisms, PIC value of equiprequent alleles, and PIC value for cross fertilized organisms with variable allele number.

| DNA Sample | % Heterozygous Loci | marker | sum_Fsquare | picval-self_fert | picval equipreq | picval_cross_fertil. |
|------------|---------------------|--------|-------------|------------------|-----------------|----------------------|
| 1          | 0.25                | 0015_a | 0.3191589   | 0.6808411        | 0.578978697     | 0.568978697          |
| 2          | 0.375               | 0076_a | 0.16666666  | 0.83333334       | 0.805555564     | 0.795555564          |
| 3          | 0.5                 | 0094_a | 0.26847222  | 0.73152778       | 0.659450447     | 0.649450447          |
| 4          | 0.625               | 0114_a | 0.32986111  | 0.67013889       | 0.561330538     | 0.551330538          |
| 5          | 0.5                 | 0124_a | 0.2982253   | 0.7017747        | 0.61283637      | 0.60283637           |
| 6          | 0.5                 | 0194_a | 0.3888888   | 0.61111112       | 0.459876701     | 0.449876701          |
| 7          | 0.78                | 0284_a | 0.20476466  | 0.79523534       | 0.753306774     | 0.743306774          |
| 8          | 0.5                 | 0350_a | 0.1388888   | 0.86111112       | 0.841821101     | 0.831821101          |
| 9          | 0.5                 |        |             |                  |                 |                      |
| 10         | 0.375               |        |             |                  |                 |                      |
| 11         | 0.375               |        |             |                  |                 |                      |
| 12         | 0.25                |        |             |                  |                 |                      |
